# Supplementary material
Source: publisher site journal article supplement (https://www.dovepress.com/article/269992)
Supplement: Supplementary file 1 [file get_supplementary_file.php]

**Supplementary materials**

Supplementary Table 1 Longitudinal association between total sleep time & nighttime sleep and depressive symptoms

| Variables | OR | SE | *P* | 95%CI |
| --- | --- | --- | --- | --- |
| Total sleep time (continuous  analyses in hours) | 0.93 | 0.02 | 0.001 | (0.89,0.97) |
| Nighttime sleep (continuous analyses in hours) | 0.88 | 0.02 | <0.001 | (0.84,0.92) |

Note: Odds ratio (OR) was adjusted for age, gender, marital status, education, residency, health status, chronic disease status, BMI, smoking and drinking status.

Supplementary Table 2 Longitudinal association between total sleep time & daytime nap and depressive symptoms

| Variables | OR | SE | *P* | 95%CI |
| --- | --- | --- | --- | --- |
| Total sleep time (continuous  analyses in hours) | 0.82 | 0.01 | <0.001 | (0.80,0.83) |
| Daytime nap (continuous analyses in hours) | 1.14 | 0.01 | <0.001 | (1.09,1.20) |
|  |  |  |  |  |
| Daytime nap time (category analyses) |  |  |  |  |
| Moderate nappers | 1.00(Ref) |  |  |  |
| Non-nappers | 0.97 | 0.04 | 0.44 | (0.90,1.05) |
| Short nappers | 0.99 | 0.06 | 0.89 | (0.88,1.11) |
| Extended nappers | 1.32 | 0.07 | <0.001 | (1.19,1.45) |

Note: Odds ratio (OR) was adjusted for age, gender, marital status, education, residency, health status, chronic disease status, BMI, smoking and drinking status.

Supplementary Table 3-1 The descriptive statistics of sleep duration for Chinese elderly with depressive symptoms at wave 1

| Sleep duration | Overall | Persistent depressive symptoms at wave 2 | | |
| --- | --- | --- | --- | --- |
| No | Yes | *P* |
| Total sleep time, hours, mean(SD) | 6.08(2.36) | 6.73(2.29) | 5.84(2.31) | <0.001 |
| Nighttime sleep, hours, mean(SD) | 5.57(2.13) | 6.06(2.08) | 5.29(2.12) | <0.001 |
| Daytime nap, hours, mean(SD) | 0.51(0.70) | 0.67(0.79) | 0.55(0.74) | <0.001 |
| Sample size, N | 2072 | 967 | 1105 |  |

Supplementary 3-2 Association between total sleep time and persistent depressive symptoms at follow-up (wave 2)

| Variables | OR | SE | *P* | 95%CI |
| --- | --- | --- | --- | --- |
| Total sleep time (continuous  analyses in hours) | 0.85 | 0.02 | <0.001 | (0.82,0.89) |
|  |  |  |  |  |
| Total sleep time (category analyses) |  |  |  |  |
| 7-8h | 1.00(Ref) |  |  |  |
| < 6h | 1.77 | 0.24 | <0.001 | (1.34,2.32) |
| 6-7h | 1.16 | 0.19 | 0.36 | (0.84,1.59) |
| 8-9h | 0.82 | 0.14 | 0.26 | (0.59,1.15) |
| > 9h | 0.70 | 0.12 | 0.04 | (0.51,0.98) |

Note: Odds ratio (OR) was adjusted for age, gender, marital status, education, residency, health status, chronic disease status, BMI, smoking and drinking status.

Supplementary Table 4-1 The descriptive statistics of sleep duration for Chinese elderly without depressive symptoms at wave 1

| Sleep duration | Overall | Incidence of depressive symptoms at W2 | | |
| --- | --- | --- | --- | --- |
| No | Yes | P |
| Total sleep time, hours, mean(SD) | 7.23(1.96) | 7.26(2.02) | 6.44(2.29) | <0.001 |
| Nighttime sleep, hours, mean(SD) | 6.62(1.76) | 6.53(1.80) | 5.75(2.04) | <0.001 |
| Daytime nap, hours, mean(SD) | 0.62(0.74) | 0.73(0.79) | 0.69(0.80) | 0.25 |
| Sample size, N | 3036 | 2489 | 547 |  |

Supplementary 4-2 Association between total sleep time and new onsets of depressive symptoms at follow-up (wave 2)

| Variables | OR | SE | *P* | 95%CI |
| --- | --- | --- | --- | --- |
| Total sleep time (continuous  analyses in hours) | 0.83 | 0.02 | <0.001 | (0.79,0.88) |
|  |  |  |  |  |
| Total sleep time (category analyses) |  |  |  |  |
| 7-8h | 1.00(Ref) |  |  |  |
| < 6h | 1.97 | 0.30 | <0.001 | (1.47,2.65) |
| 6-7h | 1.28 | 0.21 | 0.12 | (0.93,1.76) |
| 8-9h | 0.63 | 0.11 | 0.01 | (0.44,0.90) |
| > 9h | 0.75 | 0.13 | 0.08 | (0.54,1.04) |

Note: Odds ratio (OR) was adjusted for age, gender, marital status, education, residency, health status, chronic disease status, BMI, smoking and drinking status.
